# Supplementary material
Source: MDPI journal article supplement (https://www.mdpi.com/2673-9976/18/1/11)
Supplement: s1 [file s1]

# Chemopreventive potential of *Santolina chamaecyparissus* against MNU-induced mammary cancer in female Wistar rats

T. Azevedo<sup>1\*</sup>, J. Silva<sup>1</sup>, A. Valada<sup>1</sup>, L. Anjos<sup>1</sup>, T.C. Finimundy<sup>2</sup>, L. Barros<sup>2</sup>, M. Matos<sup>1,3</sup>, P.A. Oliveira<sup>1,4</sup>

<sup>1</sup> CITAB, Inov4Agro, University of Trás-os-Montes and Alto Douro (UTAD), Vila Real, Portugal; <sup>2</sup> CIMO, Campus de Santa Apolónia, Instituto Politécnico de Bragança, Bragança, Portugal; <sup>3</sup> Department of Genetics and Biotechnology, School of Life and Environmental Sciences, UTAD, Vila Real, Portugal; <sup>4</sup> Department of Veterinary Sciences, School of Agrarian and Veterinary Sciences, UTAD, Vila Real, Portugal.

utad UNIVERSIDADE DE TRÁS-OS-MONTES E ALTO DOURO

ipb INSTITUTO POLITÉCNICO DE BRAGANÇA

CITAB Together for Excellent Science

Inov4Agro

CIMO Centro de Investigação de Montanha

\*tiagoazevedog9@gmail.com

## INTRODUCTION

**Breast cancer** is the **most often diagnosed** cancer worldwide, with the **greatest fatality** rate among women in 2021. *Santolina chamaecyparissus* L. has been shown to have **anti-diabetic**, **immunomodulatory**, and **anti-cancer** properties. It has been shown to successfully **inhibit** cancer cells' **proliferation**, especially the **human breast adenocarcinoma** (MCF-7) cell line.

## AIM

This study's goal was to evaluate the **chemopreventive potential** of a *Santolina chamaecyparissus* aqueous extract (SCE) on *N*-methyl-*N*-nitrosourea (MNU)-induced **mammary cancer** in **female Wistar rats**.

## METHODOLOGY

SCE was supplemented in **drinking water** (120 µg/mL) *ad libitum* and replaced every 2-3 days due to the compounds' stability.

A total of **nineteen compounds** were identified in the extract, being myricetin-*O*-glucuronide and 1,3-*O*-dicafeoylquinic acid the main compounds found.

At **50 days of age**, the MNU was administered by **intraperitoneal** route. Humane endpoints analysis was performed weekly. Induced animals were palpated twice a week. After twenty-one weeks, animals were sacrificed by ketamine/xylazine overdose.

This study was **approved** by UTAD's **ORBEA**, under reference **834-e-CITAB-2020!**

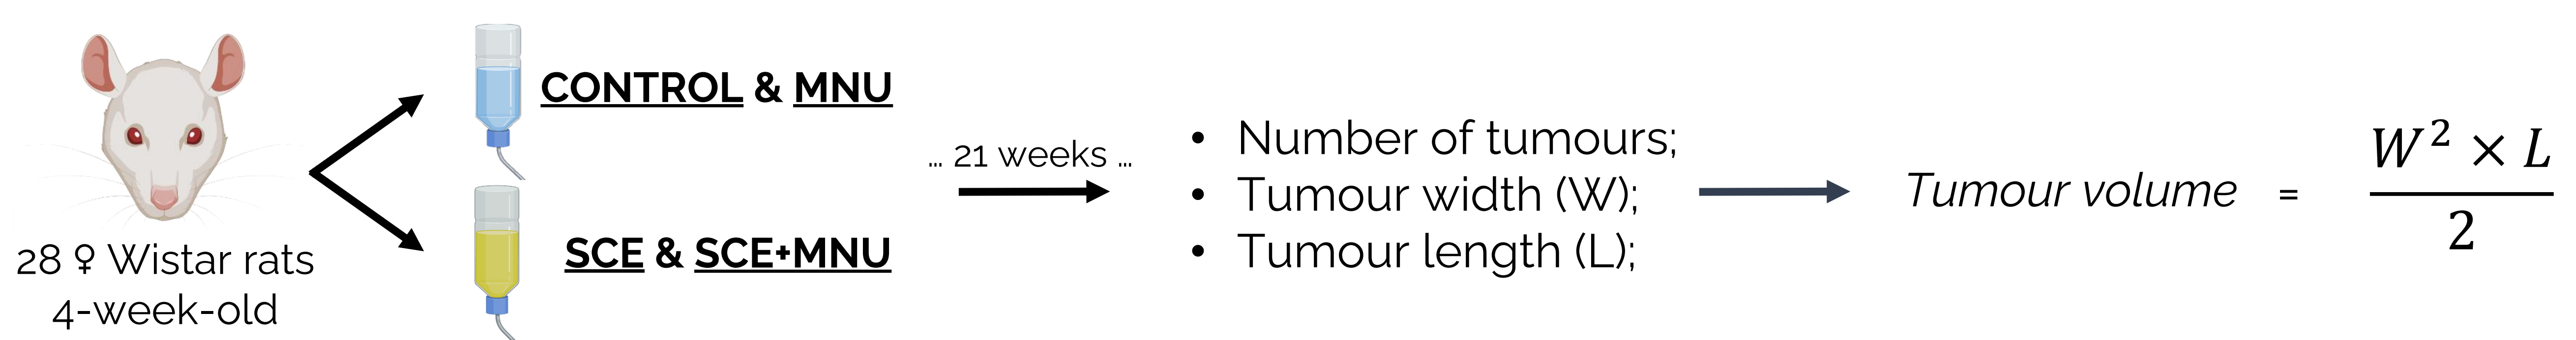

## RESULTS

**Two animals** from the **MNU group** were **sacrificed** before the experiment's completion, because they reached the **Humane endpoints score** established. The tumour incidence in **SCE+MNU** (28.57%) was **lower** than in **MNU** (57.14%). MNU group had a **higher tumour weight** (Fig. 1a) than SCE+MNU group and a larger tumour **volume** (Fig. 1b) than SCE+MNU. In MNU group, the first tumour appeared during the **ninth week**; in SCE+MNU, it only appeared on the **sixteenth week** (Fig. 2).

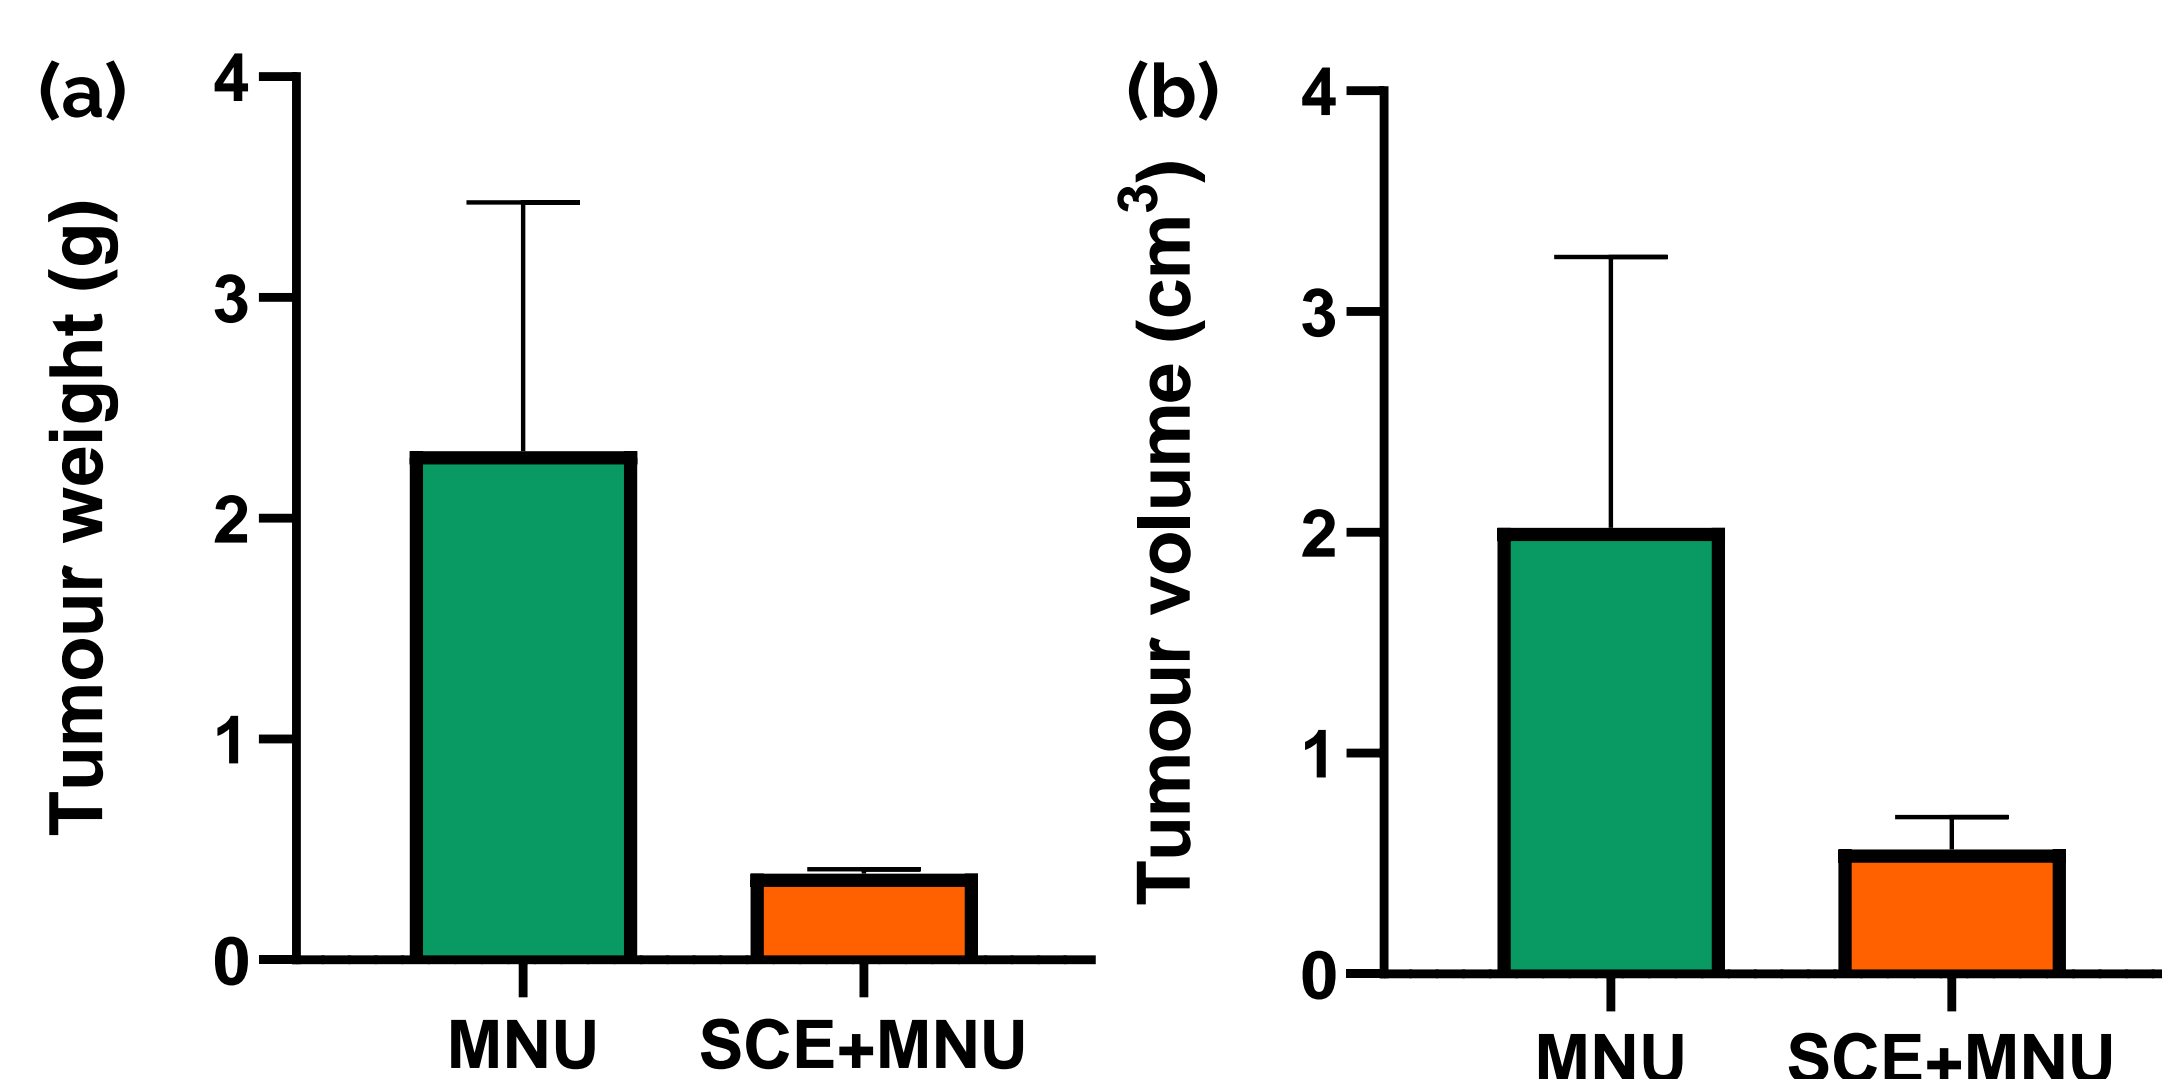

**Figure 1.** Tumour weight (a) and volume (b) of tumours from the induced groups. Data are expressed as mean ± standard error.

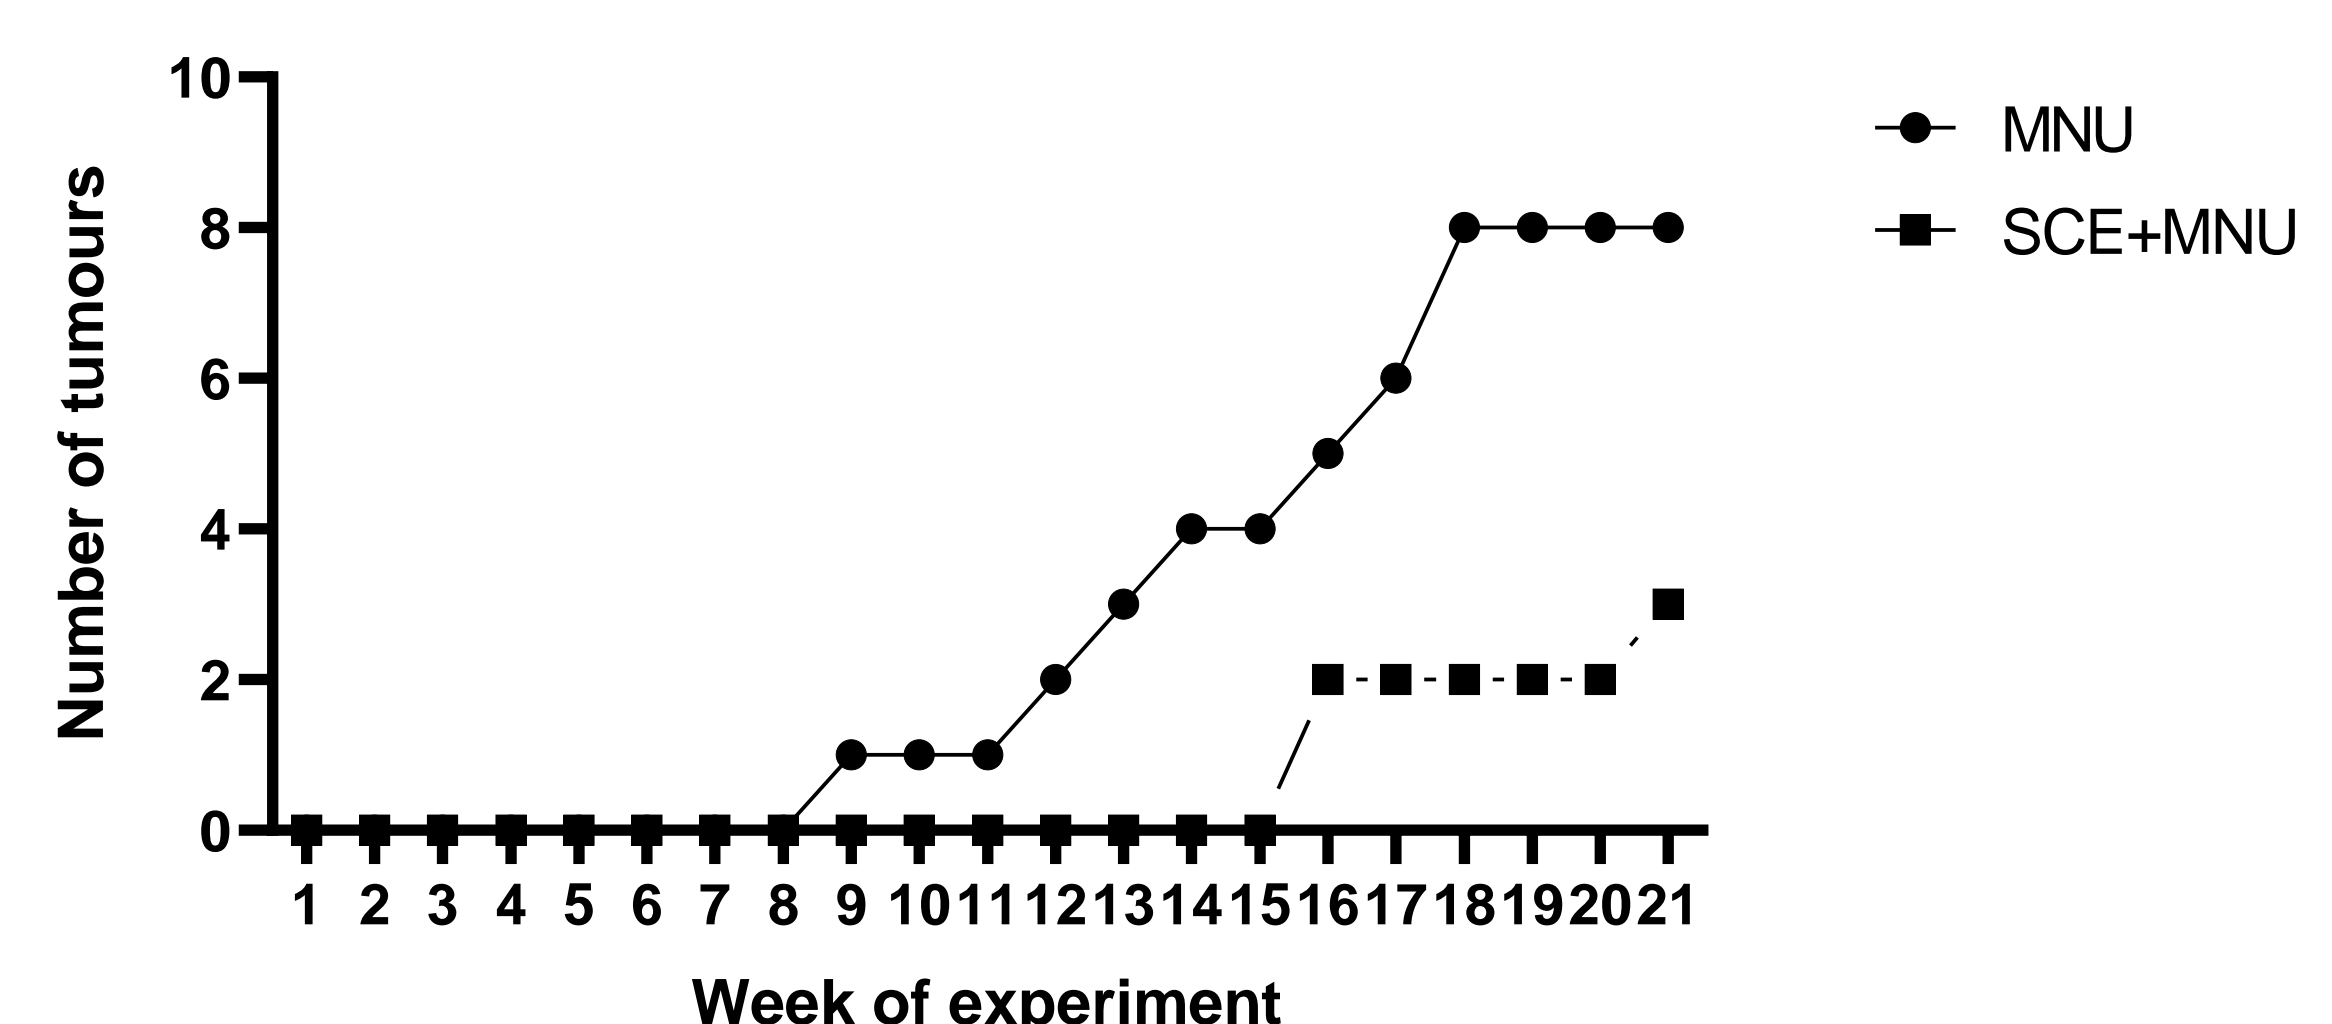

**Figure 2.** Number of tumours felt by palpation each week of the experimental trial.

## CONCLUDING REMARKS

Despite the lack of statistically significant differences between groups, the absence of mortality in SCE+MNU, as well as the lower values in each parameter, suggest that *Santolina chamaecyparissus* has an interesting potential as a chemoprotective agent. Histopathological analysis will help understand this extract's impact in oncogenesis.

Foods 2022

MDPI
